# Supplementary material for: Phenolic metabolites from mangrove-associated Penicillium pinophilum fungus with lipid-lowering effects
Source: Royal Society of Chemistry journal article supplement (doi:10.1039/c6ra00033a), 2016-01-01
Supplement: c6ra00033a1.pdf [file c6ra00033a1.pdf]

**Phenolic Metabolites from Mangrove-Associated *Penicillium pinophilum* Fungus  
with Lipid-Lowering Effects**

**Supporting Information**

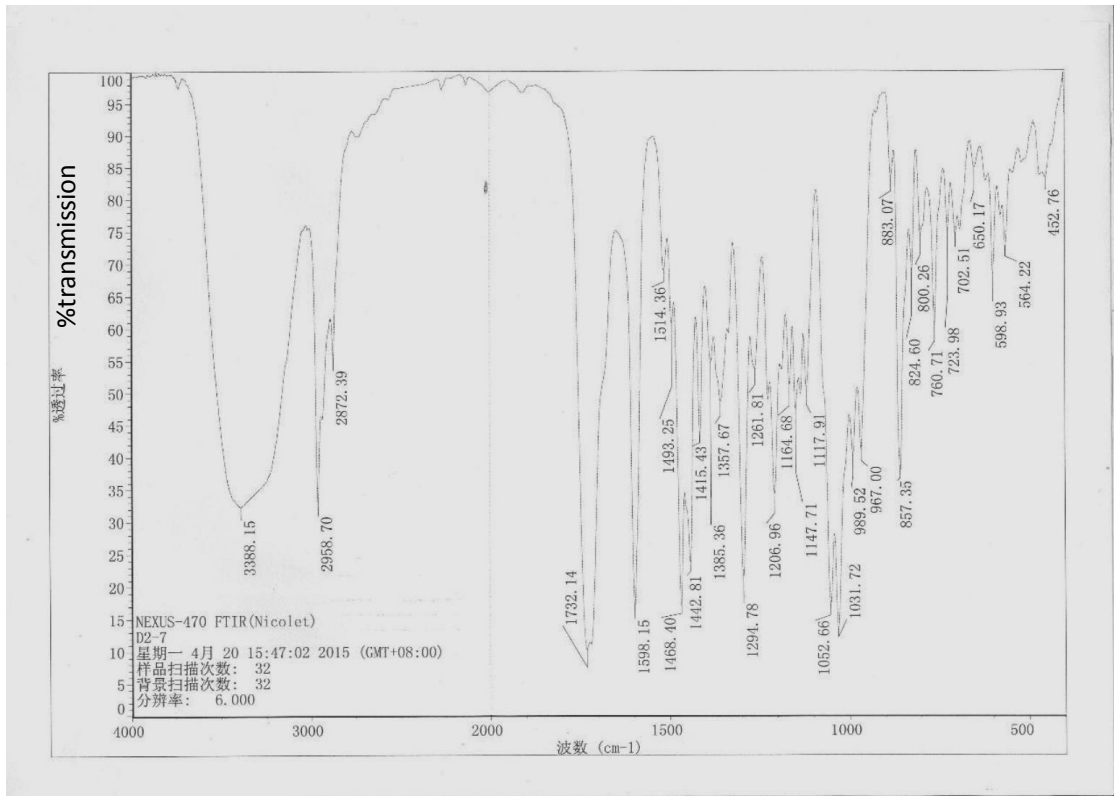

Fig. S1 IR spectrum of compound 1

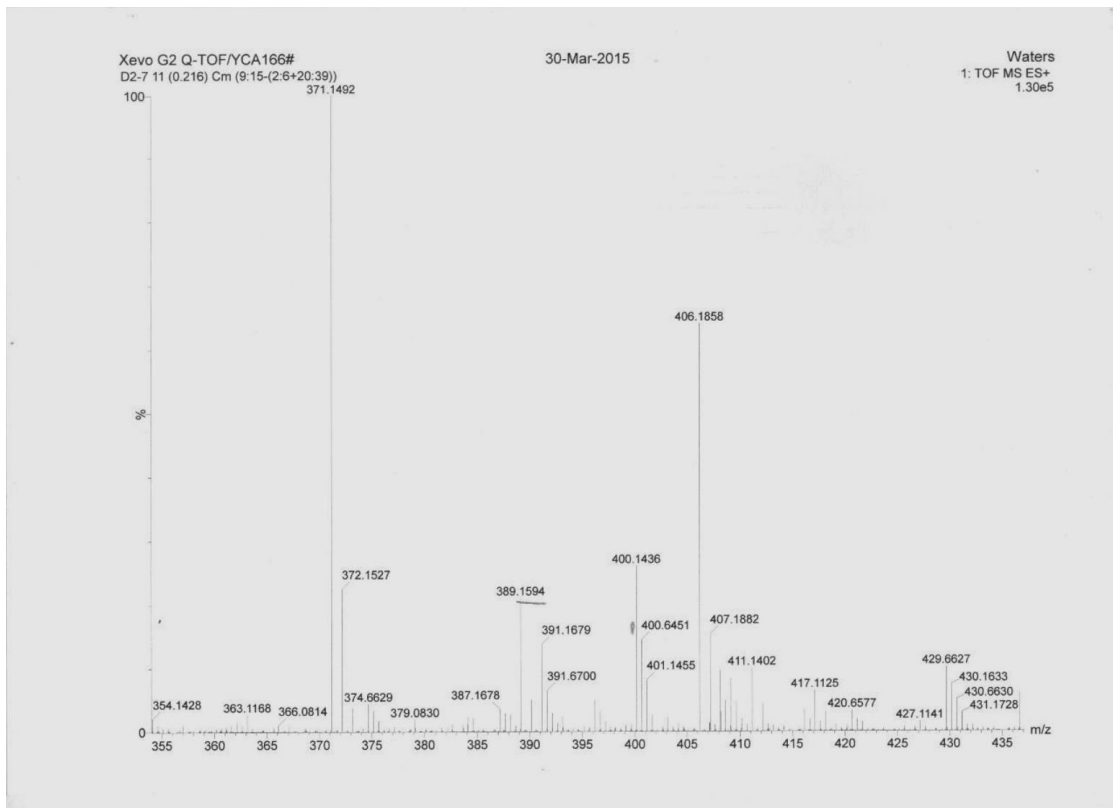

Fig. S2. HRESIMS spectrum of compound 1

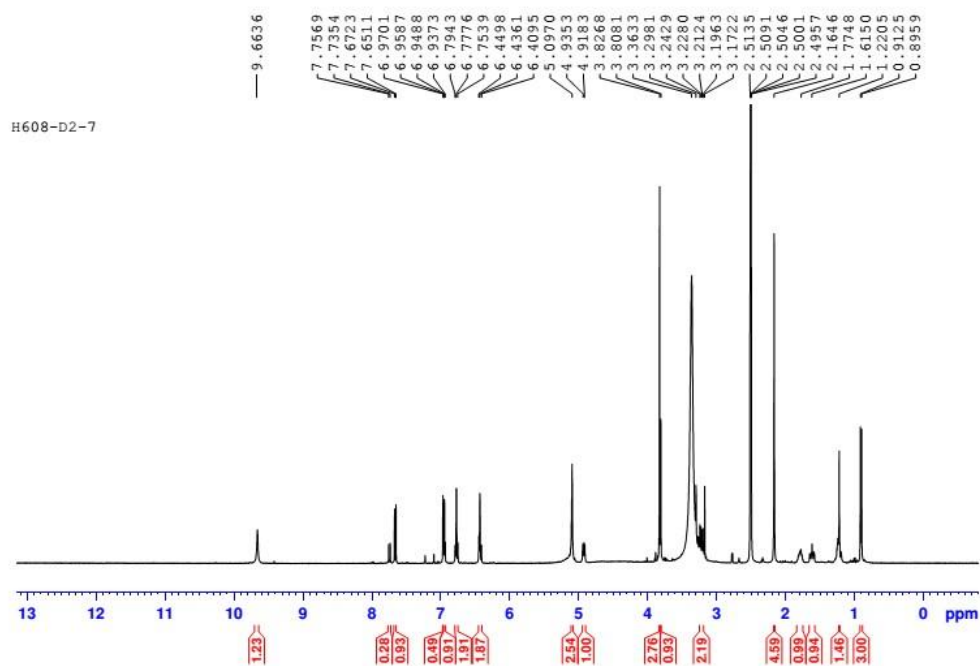

Fig. S3.  $^1\text{H}$  NMR spectrum of compound **1**

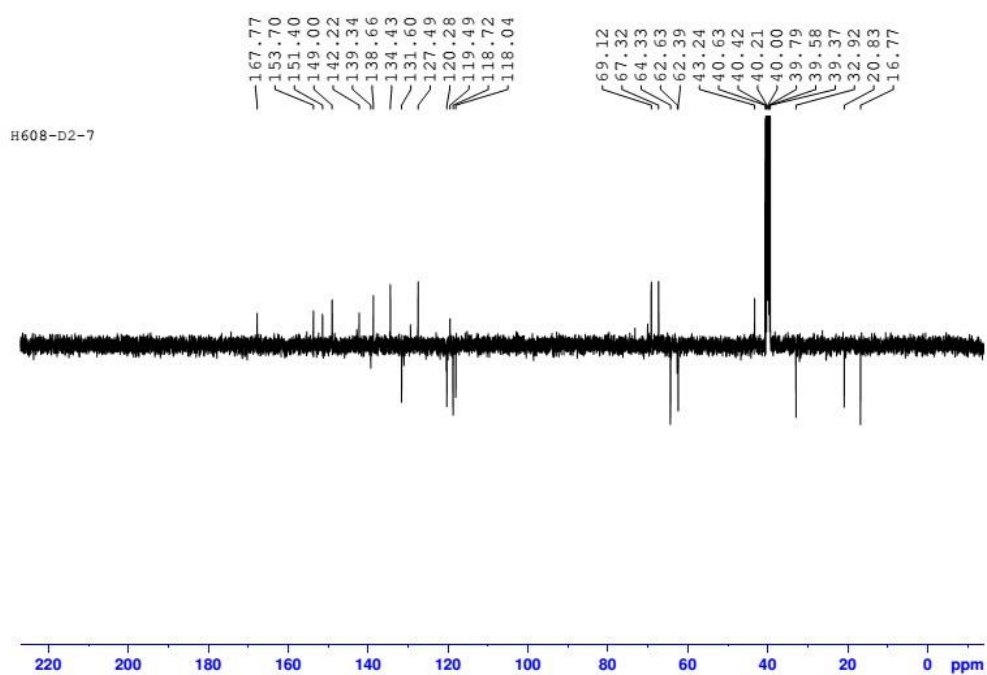

Fig. S4.  $^{13}\text{C}$  NMR (APT) spectrum of compound **1**

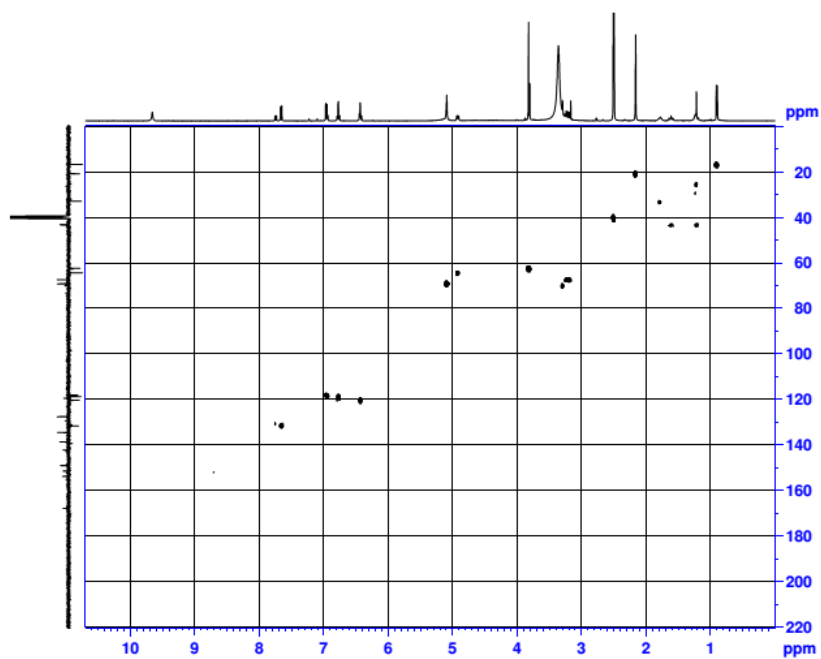

Fig. S5. HMBC spectrum of compound **1**

H608-D2-7

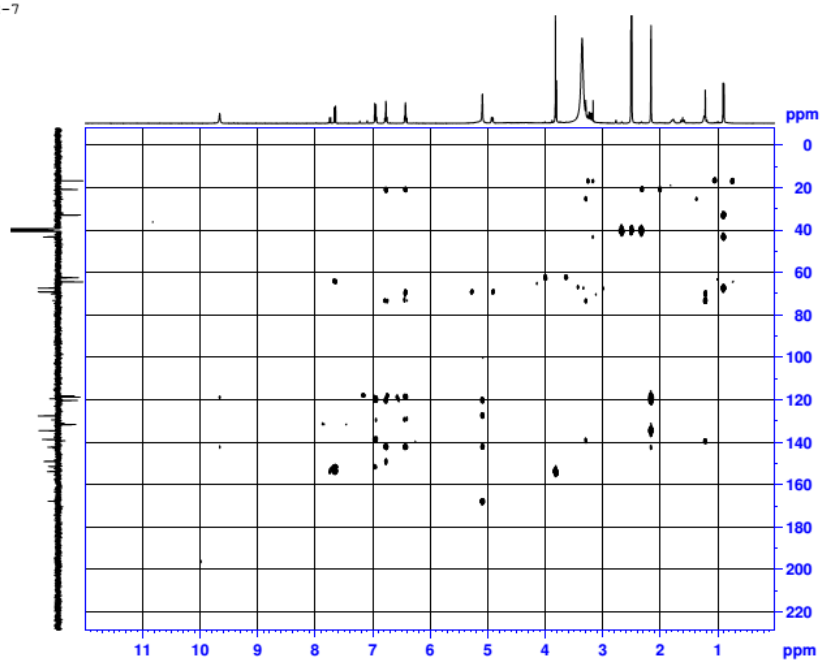

Fig. S6. HMBC spectrum of compound **1**

Table S1. Spectrophotometry at 358 nm after Oil Red O staining for HepG2 cells.

|         | blk   | nc    | simv  | 1     | 2     | 3     | 4     | 5     | 6     | 7     | 8     | 9     | 10    | 11    | 12    | 13    | 14    | 15    | 16    |
|---------|-------|-------|-------|-------|-------|-------|-------|-------|-------|-------|-------|-------|-------|-------|-------|-------|-------|-------|-------|
| Average | 0.252 | 0.284 | 0.260 | 0.275 | 0.274 | 0.274 | 0.269 | 0.274 | 0.274 | 0.271 | 0.267 | 0.278 | 0.276 | 0.265 | 0.272 | 0.271 | 0.269 | 0.272 | 0.275 |
| SEM     | 0.003 | 0.002 | 0.002 | 0.004 | 0.003 | 0.004 | 0.007 | 0.004 | 0.003 | 0.004 | 0.003 | 0.003 | 0.008 | 0.003 | 0.004 | 0.003 | 0.004 | 0.003 | 0.001 |

Table S2. Intracellular levels of total cholesterol (TC) for HepG2 cells.

|         | blk   | nc    | simv  | 4     | 7     | 8     | 11    | 12    | 13    | 14    | 15    |
|---------|-------|-------|-------|-------|-------|-------|-------|-------|-------|-------|-------|
| Average | 57.98 | 64.92 | 58.60 | 52.87 | 61.77 | 60.54 | 57.60 | 63.60 | 51.68 | 49.50 | 52.68 |
| SEM     | 1.98  | 0.91  | 1.35  | 1.07  | 0.87  | 0.57  | 3.08  | 1.15  | 2.22  | 3.34  | 2.01  |

Table S3. Intracellular levels of total cholesterol (TG) for HepG2 cells.

|         | blk   | nc    | simv  | 4     | 7     | 8     | 11    | 12    | 13    | 14    | 15    |
|---------|-------|-------|-------|-------|-------|-------|-------|-------|-------|-------|-------|
| Average | 52.98 | 64.92 | 58.60 | 52.87 | 61.77 | 60.54 | 57.60 | 63.60 | 51.68 | 49.50 | 52.68 |
| SEM     | 1.98  | 0.91  | 1.35  | 1.07  | 0.87  | 0.97  | 3.08  | 1.15  | 2.22  | 3.34  | 2.01  |

Table S4. Spectrophotometry at 358 nm after Oil Red O staining for RAW264.7 macrophages.

|         | blk   | nc    | simv  | 1     | 2     | 3     | 4     | 5     | 6     | 7     | 8     | 9     | 10    | 11    | 12    | 13    | 14    | 15    | 16    |
|---------|-------|-------|-------|-------|-------|-------|-------|-------|-------|-------|-------|-------|-------|-------|-------|-------|-------|-------|-------|
| Average | 0.235 | 0.273 | 0.254 | 0.265 | 0.261 | 0.268 | 0.244 | 0.265 | 0.274 | 0.271 | 0.260 | 0.272 | 0.269 | 0.256 | 0.263 | 0.238 | 0.246 | 0.252 | 0.268 |
| SEM     | 0.006 | 0.007 | 0.006 | 0.006 | 0.004 | 0.005 | 0.006 | 0.006 | 0.007 | 0.005 | 0.005 | 0.005 | 0.009 | 0.008 | 0.007 | 0.004 | 0.010 | 0.006 | 0.006 |

Table S5. Intracellular levels of total cholesterol (TC) for RAW264.7 macrophages.

|         | Blk  | NC    | Rosig | 4    | 8     | 11    | 13    | 14    | 15   | 16    |
|---------|------|-------|-------|------|-------|-------|-------|-------|------|-------|
| Average | 8.72 | 14.40 | 10.19 | 9.23 | 12.32 | 11.02 | 12.45 | 11.00 | 9.26 | 11.24 |
| SEM     | 0.59 | 1.00  | 0.22  | 0.04 | 1.18  | 0.81  | 0.66  | 1.25  | 0.14 | 0.19  |

Table S6. Cholesterol efflux rate to HDL.

|         | Blk   | NC    | Rosig | 4     | 11    | 14    | 15    | 16    |
|---------|-------|-------|-------|-------|-------|-------|-------|-------|
| Average | 45.28 | 58.86 | 63.38 | 63.92 | 61.27 | 62.39 | 64.88 | 60.26 |
| SEM     | 0.82  | 0.93  | 0.30  | 0.13  | 2.05  | 0.37  | 1.08  | 0.68  |
